# Supplementary material for: How has Guinea learnt from the response to outbreaks? A learning health system analysis
Source: HighWire-hosted journal article supplement (doi:10.1136/bmjgh-2022-010996), 2023-02-01
Supplement: bmjgh-2022-010996supp002_data_supplement.pdf [file bmjgh-2022-010996supp002_data_supplement.pdf]

**Supplementary file 1** – Developing the review question using the SPICE framework

| <b>Acronym</b> | <b>Meaning</b>                                    | <b>Attribute</b>                                                  |
|----------------|---------------------------------------------------|-------------------------------------------------------------------|
| <b>S</b>       | Setting                                           | - Guinea<br>- January 2014- December 2021                         |
| <b>P</b>       | Perspective (or Population)                       | - Health system (actors at all levels)<br>- Response to outbreaks |
| <b>I</b>       | Intervention (or phenomenon of interest/practice) | Learning                                                          |
| <b>C</b>       | Comparison                                        | Not applicable                                                    |
| <b>E</b>       | Evaluation                                        | Learning dimensions                                               |
