# Supplementary material for: How has Guinea learnt from the response to outbreaks? A learning health system analysis
Source: HighWire-hosted journal article supplement (doi:10.1136/bmjgh-2022-010996), 2023-02-01
Supplement: bmjgh-2022-010996supp003_data_supplement.pdf [file bmjgh-2022-010996supp003_data_supplement.pdf]

## Supplementary file 2 – Search strategy

| Literature type | Database/Engine                                      | Search query (5/3/2022)                                                                                                                                                                                                                                                                                                                                                                                                                                                                                                                                    |
|-----------------|------------------------------------------------------|------------------------------------------------------------------------------------------------------------------------------------------------------------------------------------------------------------------------------------------------------------------------------------------------------------------------------------------------------------------------------------------------------------------------------------------------------------------------------------------------------------------------------------------------------------|
| Peer-reviewed   | PubMed                                               | ((((((((((("Ebola virus"[Mesh] OR "Hemorrhagic Fever, Ebola"[Mesh]) OR "Lassa Fever/prevention and control"[Mesh]) OR "Measles"[Mesh]) OR "Meningitis"[Mesh]) OR "Yellow Fever"[Mesh]) OR "Poliomyelitis"[Mesh]) OR ("Marburg Virus Disease"[Mesh] OR "Marburgvirus"[Mesh] )) OR ("COVID-19"[Mesh] OR "SARS-CoV-2"[Mesh] )) OR "Pandemics"[Mesh]) OR "Epidemics"[Mesh]) AND "Disease Outbreaks/prevention and control"[Mesh]) OR Preparedness OR Response OR "Lessons learned" OR ("Learning"[Mesh] OR "Learning Health System"[Mesh])) AND "Guinea"[Mesh] |
|                 | Web of Science                                       | ALL=("Lessons learned" AND response AND Ebola OR Measles OR "Yellow fever" OR "Lassa fever" OR Polio OR Meningitis OR "Marburg fever" OR "COVID-19" and 2014 or 2015 or 2016 or 2017 or 2018 or 2019 or 2020 or 2021 (Publication Years) and Tropical Medicine or Infectious Diseases or Social Sciences Biomedical or Political Science or Public Environmental Occupational Health or Multidisciplinary Sciences (Web of Science Categories) and GUINEA (Countries/Regions)                                                                              |
|                 | Google Scholar                                       | Guinea learning "Ebola Virus" OR "Hemorrhagic Fever Ebola" OR "Lassa Fever" OR Measles OR "Yellow Fever" OR Poliomyelitis OR Meningitis OR "Marburg Virus Disease" OR "COVID 19" OR "Prevention and Control" OR Response OR "lessons learned" -"Papua New" -"Guinea Bissau" -"Equatorial Guinea"                                                                                                                                                                                                                                                           |
| Grey literature | Google customised search (for websites and webpages) | "Lessons learned" AND response AND Ebola OR Measles OR "Yellow fever" OR "Lassa fever" OR Polio OR Meningitis OR "Marburg fever" OR "COVID-19" AND Guinea                                                                                                                                                                                                                                                                                                                                                                                                  |
