# Supplementary material for: How has Guinea learnt from the response to outbreaks? A learning health system analysis
Source: HighWire-hosted journal article supplement (doi:10.1136/bmjgh-2022-010996), 2023-02-01
Supplement: bmjgh-2022-010996supp004_data_supplement.pdf [file bmjgh-2022-010996supp004_data_supplement.pdf]

**Supplementary file 3** – Characteristics of reports included in the synthesis and key lessons learned/recommendations

| Author (year)              | Country | Type of Report       | Study Design/Method            | Outbreak                  | Key Lessons Learned/Recommendations                                                                                                                                                                                                                                                                                                         |
|----------------------------|---------|----------------------|--------------------------------|---------------------------|---------------------------------------------------------------------------------------------------------------------------------------------------------------------------------------------------------------------------------------------------------------------------------------------------------------------------------------------|
| Camara S (2020) [43]       | Guinea  | Research article     | Parallel mixed method          | Ebola Virus Disease (EVD) | Community engagement and mobilisation are prominent in outbreak control.                                                                                                                                                                                                                                                                    |
| Camara BS (2020) [116]     | Guinea  | Research article     | Cross-sectional                | EVD                       | Preserving communities' values and addressing outbreak-related psychosocial effects.                                                                                                                                                                                                                                                        |
| Lesho EP (2016) [109]      | Guinea  | Editorial commentary | Not Applicable (NA)            | EVD                       | Engaging local providers to collaboratively plan and execute humanitarian medical assistance, with external agents remaining in the background. Banking serum of EVD patients and performing real-time sequencing.                                                                                                                          |
| Alessandro A (2018) [121]  | Guinea  | Research article     | Real-time field EVD sequencing | EVD                       | Combining thorough epidemiological and genomic investigations, particularly in low resource settings with a limited epidemiological investigation, as the genetic characterisation can support the outbreak investigation in real-time linking cases (sequencing).                                                                          |
| Sidibé S (2018) [101]      | Guinea  | Research article     | Cross-sectional                | EVD                       | Capacity building of healthcare providers for better preparedness and response to outbreaks.                                                                                                                                                                                                                                                |
| Magassouba AS (2020) [110] | Guinea  | Research article     | Cohort study                   | EVD                       | Better preparedness of the health system to prevent service disruptions during the response to mitigate collateral effects (e.g. Tuberculosis).                                                                                                                                                                                             |
| Kodish SR (2018) [87]      | Guinea  | Research article     | Qualitative study              | EVD                       | Early community engagement to mitigate outbreak collateral effects (e.g. maternal and child nutrition).                                                                                                                                                                                                                                     |
| Gsell PS (2017) [118]      | Guinea  | Research article     | Field intervention             | EVD                       | A ring vaccination strategy can be rapidly and safely implemented at scale in response to EVD outbreaks in rural settings.                                                                                                                                                                                                                  |
| Kolie D (2018) [111]       | Guinea  | Research article     | Cross-sectional                | EVD                       | Enhancing outbreak preparedness and health system resilience is required to mitigate collateral effects (e.g. Malaria in under-five children).                                                                                                                                                                                              |
| Fairhead J (2016) [105]    | Guinea  | Review               | Case study                     | EVD                       | Four kinds of local accommodations broke down in responding to the EVD in Forest Guinea—accommodations with hospital practices; accommodations with mines (and extractive economies); accommodations with state authority; and accommodations with sorcerers. Therefore, there is a need to involving anthropologists in outbreak response. |

|                           |                                    |                  |                      |     |                                                                                                                                                                                                                                                                                                                                         |
|---------------------------|------------------------------------|------------------|----------------------|-----|-----------------------------------------------------------------------------------------------------------------------------------------------------------------------------------------------------------------------------------------------------------------------------------------------------------------------------------------|
| Soeters HM (2016) [102]   | Guinea                             | Research article | Descriptive          | EVD | Infection prevention and control (IPC) training and capacity building for frontline healthcare workers (HCWs) proved helpful during the EVD and need to be considered in outbreak response                                                                                                                                              |
| Delamou A (2017) [114]    | Guinea                             | Research article | Cohort study         | EVD | Maternal and child health indicators significantly declined during the EVD outbreak. There is a need for designing parallel strategies and interventions to counter service disruptions (mitigate collateral effects), particularly developing toolkits for monitoring health service disruptions and adjusting programmes accordingly. |
| Keita M (2017) [96]       | Guinea                             | Research article | Case series          | EVD | Strengthening social mobilisation and the training of HCWs.                                                                                                                                                                                                                                                                             |
| Diallo B (2016) [119]     | Guinea                             | Brief report     | NA                   | EVD | Persistence of Ebola virus in a survivor's seminal fluid 531 days after onset of disease causing a new cluster of EVD in Guinea and Liberia; Need for outbreak response to combine field epidemiology with real-time molecular epidemiology and the availability of an up-to-date virus genome repository for the outbreak.             |
| Moisan F (2016) [115]     | Guinea                             | Research article | Descriptive analysis | EVD | The EVD outbreak resulted in a modest decrease in healthcare attendance in Guéckédou, requiring, nevertheless, intervention design to counter service disruptions during future outbreaks.                                                                                                                                              |
| Leno NN (2018) [112]      | Guinea                             | Research article | Cross-sectional      | EVD | Designing strategies to mitigate outbreak collateral effects (e.g. Prevention of Mother To Child Transmission of HIV).                                                                                                                                                                                                                  |
| Bah EM (2019) [120]       | Guinea                             | Case report      | NA                   | EVD | ICP needs to be strengthened for obstetrical surgery in the context of EVD outbreaks.                                                                                                                                                                                                                                                   |
| Plucinski MM (2015) [113] | Guinea                             | Research article | Cross-sectional      |     | Designing strategies to mitigate outbreak collateral effects (e.g. Malaria)                                                                                                                                                                                                                                                             |
| Kpanake L (2019) [126]    | Guinea                             | Research article | Descriptive          | EVD | In a case of need for volunteer recruitment for the response to future outbreaks, a multifaceted motivational approach should be adopted, emphasising motivational messages that refer to patriotic values and moral responsibility.                                                                                                    |
| Baldé T (2015) [89]       | Guinea                             | Research article | Single case study    | EVD | Establishing robust coordination mechanisms for partners and within the ministry of health, departments is needed. Early community engagement is central. Developing clinical research on medicines and vaccines is needed.                                                                                                             |
| Bjorneseth F (2020) [90]  | Guinea (+Liberia and Sierra-Leone) | Policy brief     | NA                   | EVD | Community engagement, crisis communication and countering rumours have proved effective.                                                                                                                                                                                                                                                |
| Jaye T (2014) [103]       | Guinea (+Liberia and Sierra-Leone) | Policy brief     | NA                   | EVD | Investment priority must target health education, infrastructure and personnel.                                                                                                                                                                                                                                                         |

|                           |                                    |                      |                 |     |                                                                                                                                                                                                                                                                                                                                                                                                                                        |
|---------------------------|------------------------------------|----------------------|-----------------|-----|----------------------------------------------------------------------------------------------------------------------------------------------------------------------------------------------------------------------------------------------------------------------------------------------------------------------------------------------------------------------------------------------------------------------------------------|
| Undurraga EA (2017) [104] | Guinea (+Liberia and Sierra-Leone) | Opinion              | Modelling       | EVD | Strengthening the health system by increasing health personnel, bolstering primary and critical healthcare facilities, developing the infrastructure and improving disease surveillance (IDSR).                                                                                                                                                                                                                                        |
| Bhatnagar NG (2016) [97]  | Guinea (+Liberia and Sierra-Leone) | Scoping review       | NA              | EVD | Improving preparedness by building a strong health system and enhancing community participation.                                                                                                                                                                                                                                                                                                                                       |
| Vetter P (2016) [106]     | Guinea (+Liberia and Sierra-Leone) | Review               | NA              | EVD | Improving outbreak preparedness through strengthening the health system; Engaging with social scientists in designing and delivering culturally-sensitive approaches to public health.                                                                                                                                                                                                                                                 |
| Wilkinson A (2017) [45]   | Guinea (+Liberia and Sierra-Leone) | Opinion              | NA              | EVD | Engaging with anthropologists to understand social dynamics and design sturdy interventions.                                                                                                                                                                                                                                                                                                                                           |
| Scott V (2016) [91]       | Guinea (+Liberia and Sierra-Leone) | Debate               | NA              | EVD | Early community engagement for a successful response to outbreaks.<br>Investment priority must be on health personnel; Commitment is required to address the underlying social determinants of the country's vulnerability and weak capacity for successful response to outbreaks.                                                                                                                                                     |
| Karamouzian M (2014) [92] | Guinea (+Liberia and Sierra-Leone) | Letter to the editor | NA              | EVD | Community engagement and mobilisation can reduce fear and stigma; Not deploying armies, especially western armies on the ground, can lower fear in communities and prevent mistrust and violent fatal attacks on healthcare workers and volunteers.                                                                                                                                                                                    |
| Kekulé AS (2015) [107]    | Guinea (+Liberia and Sierra-Leone) | Essay                | NA              | EVD | Better preparedness and sensitive epidemiological surveillance (including genetic characterisation) are required, as naturally occurring outbreaks do not happen suddenly; Deploying anthropologists is necessary; Treatment centers are the most effective form of emergency aid; In an emergency, only actions/practices will work that have worked already before (necessity to learn). Outbreak control must be fast and flexible. |
| Jalloh MF (2017) [93]     | Guinea (and Sierra-Leone)          | Research article     | Cross-sectional | EVD | Community engagement is a cornerstone for a successful response to outbreaks.                                                                                                                                                                                                                                                                                                                                                          |
| Laverack G (2016) [94]    | Guinea (+Liberia and Sierra-Leone) | Commentary           | NA              | EVD | Community engagement and social mobilisation in outbreak response are prominent.                                                                                                                                                                                                                                                                                                                                                       |
| Delamou A (2017) [98]     | Guinea (+Liberia and Sierra-Leone) | Commentary           | NA              | EVD | Improving community participation and <u>multisectoral collaboration</u> are key to the health system's preparedness for future outbreaks. Learning from the EVD humanitarian assistance and rethinking the                                                                                                                                                                                                                            |

|                           |                                    |                  |                               |     |                                                                                                                                                                                                                                                                                                                                                                                                                                                                                                                                                                                                                                                                                                                                                                                 |
|---------------------------|------------------------------------|------------------|-------------------------------|-----|---------------------------------------------------------------------------------------------------------------------------------------------------------------------------------------------------------------------------------------------------------------------------------------------------------------------------------------------------------------------------------------------------------------------------------------------------------------------------------------------------------------------------------------------------------------------------------------------------------------------------------------------------------------------------------------------------------------------------------------------------------------------------------|
|                           |                                    |                  |                               |     | humanitarian–researchers’ collaboration is needed. Lessons learned must inform policies and programmes.                                                                                                                                                                                                                                                                                                                                                                                                                                                                                                                                                                                                                                                                         |
| Umar I (2016) [99]        | Guinea (+Liberia and Sierra-Leone) | Review           | NA                            | EVD | Multisectoral collaboration is required for major outbreaks such as EVD, including civil society organisations.                                                                                                                                                                                                                                                                                                                                                                                                                                                                                                                                                                                                                                                                 |
| Gillespie AM (2016) [86]  | Guinea (+Liberia and Sierra-Leone) | Research article | Case study                    | EVD | Community engagement and social mobilisation are central to outbreak response.                                                                                                                                                                                                                                                                                                                                                                                                                                                                                                                                                                                                                                                                                                  |
| Venables E (2017) [108]   | Guinea (+Liberia and Sierra-Leone) | Research article | Case study                    | EVD | Anthropologists played prominent roles in responding to the EVD outbreak.                                                                                                                                                                                                                                                                                                                                                                                                                                                                                                                                                                                                                                                                                                       |
| Miller NP (2018) [95]     | Guinea (+Liberia and Sierra-Leone) | Research article | Mixed methods                 | EVD | Putting community health workers and other community-level actors at the forefront.                                                                                                                                                                                                                                                                                                                                                                                                                                                                                                                                                                                                                                                                                             |
| Dhillon RS (2015) [122]   | Guinea (+Liberia and Sierra-Leone) | Perspective      | NA                            | EVD | Community engagement, risk communication, and social mobilisation are central to outbreak response                                                                                                                                                                                                                                                                                                                                                                                                                                                                                                                                                                                                                                                                              |
| Govindaraj R (2017) [100] | Guinea (+Liberia and Sierra-Leone) | Book             | NA                            | EVD | A national post-Ebola health system strengthening investment plan (shift from response to resilience) is needed.                                                                                                                                                                                                                                                                                                                                                                                                                                                                                                                                                                                                                                                                |
| Lebel R (2019) [117]      | Guinea                             | Book             | NA                            | EVD | Addressing survivors' emotional reactions is a core element of emergency response.                                                                                                                                                                                                                                                                                                                                                                                                                                                                                                                                                                                                                                                                                              |
| Keita S (2021) [85]       | Guinea                             | Book             | NA                            | EVD | Lessons:<br>Weak preparedness to respond to a major outbreak: delay in diagnosing the EVD (weak surveillance system); Lack of the necessary infrastructure (laboratory & treatment centres), skilled human resources and financial resources; lack of early community engagement and social mobilisation; WHO guidelines that were followed showed limitations; Weak coordination of actors.<br>Recommendations:<br>Putting a particular focus on health system preparedness and financing; Training human resources for health; Improving infrastructure & equipment; Laboratory capacity building; Emphasising social mobilisation and communication. Establishing a sustainable structure for outbreak response with an autonomous management mandate; Improving governance. |
| Kolie D (2019) [44]       | Guinea                             | Research article | Qualitative explanatory study | EVD | Emphasis on recruitment of HCWs facilitated by the changing practice of development cooperation partners about health financing, especially payment of staff salaries; the availability of remaining funds mobilised by donor countries and institutions for                                                                                                                                                                                                                                                                                                                                                                                                                                                                                                                    |

|                                                                     |                                    |                                                         |                    |                    |                                                                                                                                                                                                                                                                                                                                                  |
|---------------------------------------------------------------------|------------------------------------|---------------------------------------------------------|--------------------|--------------------|--------------------------------------------------------------------------------------------------------------------------------------------------------------------------------------------------------------------------------------------------------------------------------------------------------------------------------------------------|
|                                                                     |                                    |                                                         |                    |                    | the response to EVD; the availability of trained HCWs that were contracted across all levels of the health system, especially in underserved areas during the EVD outbreak, and the change of the political perception in health issues or risks.                                                                                                |
| Pastor Institute (2017) [124]                                       | Guinea (+Liberia and Sierra-Leone) | Webpage                                                 | NA                 | EVD                | Enhanced vigilance and health surveillance are essential.<br><i>"Given the risk of resurgence of the disease, former epidemic foci in Guinea, Liberia and Sierra Leone could suffer new outbreaks."</i><br>Warning issued by scientists.                                                                                                         |
| National Coordination Unit for the Fight against Ebola (2014) [138] | Guinea                             | Strategic plan for "Zero Ebola within 60 days" campaign | NA                 | EVD                | Main issues tackled: surveillance, IPC, dignified and secure burials, case management, communication/reluctance.                                                                                                                                                                                                                                 |
| Ministry of Health (2015) [127]                                     | Guinea                             | Health System Recovery & Resilience plan (2015-2017)    | NA                 | Post-EVD           | Eradicating EVD (IPC, IDSR, IHR); Improving the performance of the local health system (improving service delivery and strengthening the management system); and enhancing health system governance (management, coordination, accountability, community engagement, regulation).                                                                |
| Keita M (2020) [123]                                                | Guinea                             | Research article                                        | Cohort             | EVD                | Setting up the surveillance and alert system for early detection of Ebola resurgence among survivors, modelled on the health system, from the community level to the central level.                                                                                                                                                              |
| Ndjomou J (2021) [130]                                              | Guinea                             | Research article                                        | Descriptive        | Post-EVD (2014-16) | Guinea's laboratory capabilities have been built.                                                                                                                                                                                                                                                                                                |
| Linton NM (2020) [132]                                              | Guinea                             | Research article                                        | Modelling          | Measles            | Due to insufficient levels of herd immunity, measles transmission persists in Guinea. Further reproduction number estimation should be performed to help decision-makers and field staff understand outbreak progress and the timing and type of vaccination efforts needed to stop transmission.                                                |
| Saez AM (2018) [84]                                                 | Guinea                             | Research article                                        | Randomised control | Lassa Fever        | The chemical treatment effectively controls local rodent populations. It can partly serve as a practical, holistic approach combining rodent trapping, use of local rodenticides, environmental hygiene, house repairs and rodent-proof storage. Engaging with local stakeholders and communities in developing these actions is key to success. |
| Magassouba N (2019) [133]                                           | Guinea                             | Research article                                        | Case report (next- | Lassa Fever        | Early identification of viral haemorrhagic fever cases remains challenging in remote areas (e.g. health centres); There is a need for                                                                                                                                                                                                            |

|                                                         |                                          |                                                |                        |                  |                                                                                                                                                                                                                                                                                                                                                                                                                                                                                                                                                                                                                                                                 |
|---------------------------------------------------------|------------------------------------------|------------------------------------------------|------------------------|------------------|-----------------------------------------------------------------------------------------------------------------------------------------------------------------------------------------------------------------------------------------------------------------------------------------------------------------------------------------------------------------------------------------------------------------------------------------------------------------------------------------------------------------------------------------------------------------------------------------------------------------------------------------------------------------|
|                                                         |                                          |                                                | generation sequencing) |                  | regular awareness training to facilitate the implementation of improved field surveillance and early detection.                                                                                                                                                                                                                                                                                                                                                                                                                                                                                                                                                 |
| Mariën J (2020) [134]                                   | Guinea                                   | Research article                               | Spatial analysis       | Lassa Fever      | The risk of Lassa virus spillover is heterogeneously distributed within Guinea's villages; Viral eradication in one specific village is unlikely if rodents are not controlled in neighbouring villages.                                                                                                                                                                                                                                                                                                                                                                                                                                                        |
| National Agency for Health Security (ANSS) (2019) [135] | Guinea                                   | Management guide of priority zoonotic diseases | NA                     | Zoonotic disease | "One Health" approach; nine diseases retained: EVD, Lassa Fever, Dengue, Brucellosis, Avian Influenza, Yellow Fever, Rabies, Anthrax/charcoal, and Rift Valley Fever. Strengthening capacity of multisectoral actors in IDSR.                                                                                                                                                                                                                                                                                                                                                                                                                                   |
| Delamou A (2020) [144]                                  | Guinea (+Liberia and Sierra-Leone)       | Correspondence                                 | NA                     | COVID-19         | For more success in responding to outbreaks, the health system needs to rethink the governance of the outbreak response by prioritising internal resource mobilisation and creating better synergy between national institutions to pool existing strengths and gain support from communities. To this end, national institutions tasked with each response pillar should be identified and provided with the required resources (e.g. local budget lines) under the coordination of the MoH or the designated institution. When doing so, the path for long-term capacity building of local actors with support from developing partners could be established. |
| Delamou A (2021) [145]                                  | Guinea                                   | Research article                               | Cross-sectional        |                  | The COVID-19 pandemic jeopardised efforts to achieve Millennium Development Goals for maternal and child health in urban settings in Guinea. For the country's health system to be resilient to crises such as COVID-19, there is a need for interventions to ensure the continuity of maternal and neonatal care.                                                                                                                                                                                                                                                                                                                                              |
| Maxmen A (2020) [143]                                   | Guinea (+Liberia and Sierra-Leone)       | News in focus                                  | NA                     | COVID-19         | Political unrest can contribute to the rapid spread of an outbreak, jeopardising the response plan's implementation.                                                                                                                                                                                                                                                                                                                                                                                                                                                                                                                                            |
| Millimouno TM (2021) [140]                              | Guinea (+Mali, Senegal and Burkina Faso) | Viewpoint                                      | NA                     | COVID-19         | Political unrest can contribute to the rapid spread of an outbreak, jeopardising the response plan's implementation. Learning from past experience, strengthening contact tracing and early community engagement for rapid outbreak control.                                                                                                                                                                                                                                                                                                                                                                                                                    |
| Kolie D (2021) [142]                                    | Guinea                                   | Commentary                                     | NA                     | COVID-19         | Governance mechanisms, diagnostic capabilities, and international support need to be improved.                                                                                                                                                                                                                                                                                                                                                                                                                                                                                                                                                                  |
| Adote KA (2020) [141]                                   | Guinea (+Liberia and Sierra-Leone)       | Review                                         | Case study             | COVID-19         | Outbreak preparedness is still suboptimal (e.g. insufficient detection and response capabilities). National public health emergency                                                                                                                                                                                                                                                                                                                                                                                                                                                                                                                             |

|                                 |                                    |                                                                  |                                          |            |                                                                                                                                                                                                                                                                                                                                                                                                                                                                                              |
|---------------------------------|------------------------------------|------------------------------------------------------------------|------------------------------------------|------------|----------------------------------------------------------------------------------------------------------------------------------------------------------------------------------------------------------------------------------------------------------------------------------------------------------------------------------------------------------------------------------------------------------------------------------------------------------------------------------------------|
|                                 |                                    |                                                                  |                                          |            | response plan and International Health Regulations (IHR) simulation exercises need to be improved.                                                                                                                                                                                                                                                                                                                                                                                           |
| Impouma B (2021) [139]          | Guinea (+Liberia and Sierra-Leone) | Research article                                                 | Cross-sectional                          | COVID-19   | The introduction of rapid readiness and response measures was probably due to the lessons learned from the EVD outbreak. Some health system weaknesses persist, and the unique nature of COVID-19 continues to challenge control efforts.                                                                                                                                                                                                                                                    |
| Ministry of Health (2020) [136] | Guinea                             | National Preparedness and Response Plan                          | NA                                       | COVID-19   | It includes the following components: epidemiological surveillance, laboratory, IPC, information and communication, logistics, coordination, and technical assistance (community engagement, risk communication, treatment centres, resuscitation, Go.Data, etc.)                                                                                                                                                                                                                            |
| ANSS (2020) [137]               | Guinea                             | Community Response Strategic Plan "Stop COVID-19 within 60 days" | NA                                       | COVID-19   | It includes community engagement and social mobilisation, contact tracing, Testing, Home case management and lockdown, case referencing, Food and financial support to households, and sanitary control around lockdown areas.                                                                                                                                                                                                                                                               |
| Keita AK (2021) [149]           | Guinea                             | Research article                                                 | Case report (next-generation sequencing) | EVD (2021) | In-country sequencing and capacity building enabled a timely characterization of Ebola virus strains in the 2021 outbreak. The Ebola virus can persist in survivors' body fluids for five years. Therefore, adequate healthcare measures for survivors are needed. Additionally, there is an urgent need for further research into potent antiviral agents that can eradicate the latent virus reservoir in patients with EVD and into efficient vaccines that provide long-term protection. |
| Ministry of Health (2021) [146] | Guinea                             | Response Plan to the EVD outbreak 2021                           | NA                                       | EVD (2021) | 16 pillars: Epidemiological surveillance; Laboratory; Medical management; Risk communication, social mobilisation and community engagement; IPC and WASH; Psycho-Social care; Information management; EVD and epidemic-prone diseases vaccination management; Survivors care; Nutrition; Protection; Prevention of sexual exploitation and abuse (PSEA); Strengthening governance/Coordination; Security; Logistics; Administration and finance.                                             |
| WHO (2021) [147]                | Guinea                             | Webpage (End of EVD 2021)                                        | NA                                       | EVD (2021) | Outbreak controlled within four months. Success factors were related to incorporating experience and lessons learned from the 2014-16 EVD outbreak. These include strengthened epidemiological surveillance, deployment of skilled Guinean professionals trained during the 2014-16 EVD at all response pillars,                                                                                                                                                                             |

|                      |        |                                        |             |                            |                                                                                                                                                                                                                                                                                                                                                                                                                                                                                                                             |
|----------------------|--------|----------------------------------------|-------------|----------------------------|-----------------------------------------------------------------------------------------------------------------------------------------------------------------------------------------------------------------------------------------------------------------------------------------------------------------------------------------------------------------------------------------------------------------------------------------------------------------------------------------------------------------------------|
|                      |        |                                        |             |                            | good coordination and synergy of partners' actions, community engagement, and ring vaccination.                                                                                                                                                                                                                                                                                                                                                                                                                             |
| ANSS (2021) [148]    | Guinea | 90 days Strengthened Surveillance Plan | NA          | Post-EVD (2021)            | Maintaining and strengthening community-based surveillance through the "One Health" platforms; Ensuring vaccination of health staff, corpse washers, traditional healers, red-cross staff, and survivors' relatives in the region of N'zérékoré; Strengthening the survivors' monitoring programme (clinical, biological and psychological monitoring, surveillance and vaccination around survivors, research).                                                                                                            |
| Keita M (2022) [125] | Guinea | Research article                       | Case report | COVID-19, Lassa fever, EVD | The case clarifies the need to expand disease-specific surveillance to areas surrounding the outbreak's known geography. In this case, the extension of Ebola surveillance into neighbouring districts allowed to identify and diagnose a Lassa fever index case, facilitating prompt declaration of a Lassa fever epidemic and rapid implementation of control measures to limit the virus' spread in Guinea and Liberia.                                                                                                  |
| ANSS (2021) [150]    | Guinea | Response Plan                          | NA          | Marburg                    | It includes the following components: coordination, epidemiological surveillance, IPC, case management, risk communication, social mobilisation, community engagement, laboratory, and logistics.                                                                                                                                                                                                                                                                                                                           |
| WHO (2021) [151]     | Guinea | Final Report                           | NA          | Marburg                    | Outbreak controlled within 42 days, with only one confirmed case/death.<br>The rapid implementation of response activities, coupled with the experience of the affected prefecture in fighting against viral haemorrhagic diseases, played a central role in controlling the epidemic's spread to other regions. The source of the epidemic is still unknown, and the wife of the index case could not be found, which constitutes a significant risk for the resurgence of cases: investigations and research are ongoing. |
| WHO (2021) [153]     | Guinea | Webpage (End of Marburg)               | NA          | Marburg                    | <i>"Without immediate and decisive action, highly infectious diseases like Marburg can easily get out of hand. Today we can point to the growing expertise in outbreak response in Guinea and the region that has saved lives, contained and averted a spill-over of the Marburg virus,"</i> said the WHO Regional Director for Africa.                                                                                                                                                                                     |
| WHO (2021) [152]     | Guinea | Webpage (End of Marburg)               | NA          | Marburg                    | The training and vigilance of HCWs in the surveillance of epidemic-prone diseases were essential to the early detection of the case.                                                                                                                                                                                                                                                                                                                                                                                        |



|                           |        |                      |    |         |                                                                                                                                                                                                                                                                                                                                                                        |
|---------------------------|--------|----------------------|----|---------|------------------------------------------------------------------------------------------------------------------------------------------------------------------------------------------------------------------------------------------------------------------------------------------------------------------------------------------------------------------------|
|                           |        |                      |    |         | <i>"We immediately informed the prefectural health authorities so that they could take a sample."</i> Stated the lead of the health centre of Koundou.                                                                                                                                                                                                                 |
| Aborode AT (2022)<br>[88] | Guinea | Letter to the editor | NA | Marburg | Rapid control based on experience and knowledge from the response to the EVD outbreak (e.g. effective contact tracing, community engagement and social mobilisation); Request for support of 10 experts from WHO for outbreak investigation, rapid emergency response and improvement in disease surveillance and testing; Improvement of border disease surveillance. |
